# Supplementary material for: Macromolecular shape and interactions in layer-by-layer assemblies within cylindrical nanopores
Source: publisher site journal article supplement (doi:10.3762/bjnano.3.54), 2012-06-28
Supplement: Additional file 1 [file 2190-4286-3-54-S1.pdf]

## **Supporting Information**

**for**

# **Macromolecular shape and interactions in layer-by-layer assemblies within cylindrical nanopores**

Thomas D. Lazzara<sup>1</sup>, K. H. Aaron Lau<sup>2</sup>, Wolfgang Knoll<sup>3</sup>, Andreas Janshoff<sup>4</sup>, Claudia Steinem\*<sup>1</sup>

<sup>1</sup>Institute of Organic and Biomolecular Chemistry, Tammannstr. 2, 37077 Göttingen, Germany,

<sup>2</sup>Department of Biomedical Engineering, Northwestern University, 2145 Sheridan Road,

Evanston, IL 60202, USA, <sup>3</sup>Austrian Institute of Technology, Donau City Str. 1, 1220 Vienna,

Austria, and <sup>4</sup>Institute of Physical Chemistry, Tammannstr. 6, 37077 Göttingen, Germany

Email: Claudia Steinem - csteine@gwdg.de

\*Corresponding author

## **Additional figures**

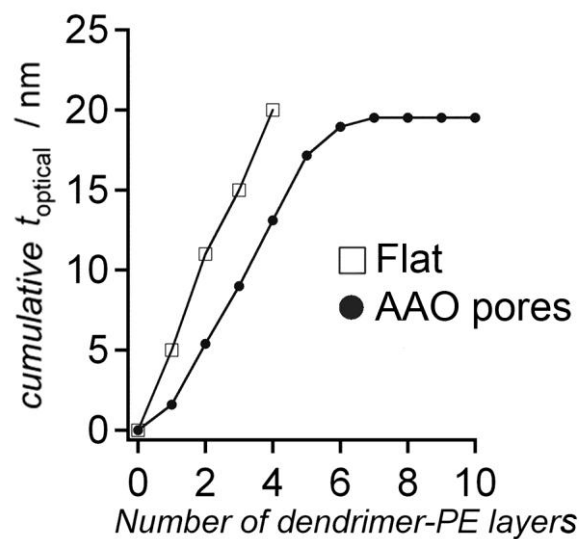

**Figure S1:** Adsorption kinetics of dendrimer-PEs on a flat, negatively charged, self-assembled monolayer on a gold surface, is contrasted with the adsorption on an AAO porous substrate with 65 nm diameter pores.

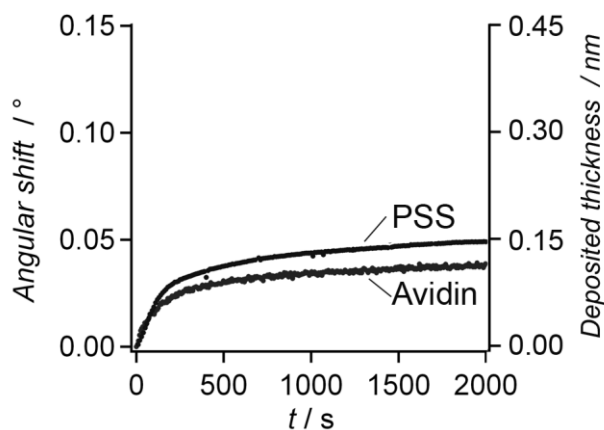

**Figure S2:** Adsorption kinetics of avidin and PSS onto AAO with pore diameters of about 25–30 nm. The rapid initial adsorption corresponds to deposition near the pore entrance, while the remaining slow adsorption is because of hindered transport of the macromolecules within the remainder of the pore length.

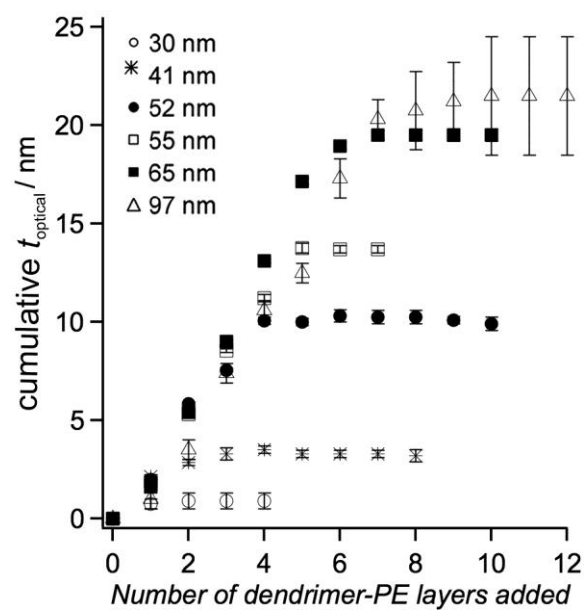

**Figure S3:** Cumulative optical thickness of the LbL multilayer film on the silanized inner-surface of the AAO cylindrical nanopores as a function of deposition steps and AAO pore diameter, for dendrimer-polyelectrolytes.
